# Supplementary material for: Synthesis and Antioxidant Evaluation of Enantiomerically Pure Bis-(1,2,3-triazolylmethyl)amino Esters from Modifiedα-Amino Acids
Source: Hindawi journal article supplement (doi:10.1155/2014/264762), 2014-01-01
Supplement: f1 [file 264762.f1.pdf]

## Supplementary Information

### **Synthesis and antioxidant evaluation of enantiomerically pure bis-(1,2,3-triazolylmethyl)amino esters from modified $\alpha$ -amino acids**

Juan I. Sarmiento-Sánchez<sup>a\*</sup>, Adrián Ochoa-Teran<sup>b</sup> and Ignacio A. Rivero<sup>b\*</sup>

<sup>a</sup>Facultad de Ingeniería, Universidad Autónoma de Sinaloa, Blvd. de las Américas, S/N, Culiacán, Sinaloa, C.P. 80000, Mexico

<sup>b</sup>Centro de Graduados e Investigación del Instituto Tecnológico de Tijuana, Apdo. Postal 1166, 22500, Tijuana, B.C., Mexico

\* authors with equal contribution. Corresponding address: Facultad de Ingeniería, Universidad Autónoma de Sinaloa, Blvd. de las Américas, S/N, 80040, Culiacán, Sinaloa, México. Tel. +52 (667) 7134043. E-mail address: jsarmiento@uas.edu.mx or irivero@tectijuana.mx

## CONTENIDO

|                                                                                                                                                                                                                |    |
|----------------------------------------------------------------------------------------------------------------------------------------------------------------------------------------------------------------|----|
| GENERAL PROCEDURE FOR THE SYNTHESIS OF A-HALOMETHYL KETONES.....                                                                                                                                               | 3  |
| GENERAL PROCEDURE FOR THE SYNTHESIS OF DI-PROPARGYL A-AMINO ESTERS .....                                                                                                                                       | 4  |
| FIGURE S1 - (S)-METHYL 2-(DI(PROP-2-YN-1-YL)AMINO)PROPANOATE (11A).....                                                                                                                                        | 6  |
| FIGURE S2 - ETHYL 2-(DI(PROP-2-YN-1-YL)AMINO)ACETATE (11B).....                                                                                                                                                | 7  |
| FIGURE S3 - (S)-METHYL 2-(DI(PROP-2-YN-1-YL)AMINO)-3-(1H-INDOL-3-YL)PROPANOATE (11C).....                                                                                                                      | 8  |
| FIGURE S4 - (S)-METHYL 2-(DI(PROP-2-YN-1-YL)AMINO)-3-PHENYLPROPANOATE (11D).....                                                                                                                               | 9  |
| FIGURE S5 - (S)-METHYL 2-(DI(PROP-2-YN-1-YL)AMINO)-3-HYDROXYPROPANOATE (11E).....                                                                                                                              | 10 |
| FIGURE S6 - (S)-METHYL 2-(((1-((R)-3-(DIBENZYLAMINO)-2-OXOBUTYL)-1H-1,2,3-TRIAZOL-4-YL)METHYL)((1-((S)-3-(DIBENZYLAMINO)-2-OXOBUTYL)-1H-1,2,3-TRIAZOL-4-YL)METHYL)AMINO)PROPANOATE (6A).....                   | 11 |
| FIGURE S7 - (R)-METHYL 2-(((1-((R)-3-(DIBENZYLAMINO)-2-OXOBUTYL)-1H-1,2,3-TRIAZOL-4-YL)METHYL)((1-((S)-3-(DIBENZYLAMINO)-2-OXOBUTYL)-1H-1,2,3-TRIAZOL-4-YL)METHYL)AMINO)-3-(1H-INDOL-3-YL)PROPANOATE (6B)..... | 13 |
| FIGURE S8 - ETHYL 2-(((1-((R)-3-(DIBENZYLAMINO)-2-OXOBUTYL)-1H-1,2,3-TRIAZOL-4-YL)METHYL)((1-((S)-3-(DIBENZYLAMINO)-2-OXOBUTYL)-1H-1,2,3-TRIAZOL-4-YL)METHYL)AMINO)ACETATE (6C).....                           | 15 |
| FIGURE S9 - (R)-METHYL 2-(((1-((R)-3-(DIBENZYLAMINO)-2-OXOBUTYL)-1H-1,2,3-TRIAZOL-4-YL)METHYL)((1-((S)-3-(DIBENZYLAMINO)-2-OXOBUTYL)-1H-1,2,3-TRIAZOL-4-YL)METHYL)AMINO)-3-HYDROXY PROPANOATE (6D)..           | 16 |

## 1 General procedure for the synthesis of $\alpha$ -halomethyl ketones

In a round bottom flask equipped with an addition funnel was added  $\alpha$ -dibenzylamino ester (1 equiv), chloriodomethane or dibromomethane (2.5 equiv), 50 mL of anhydrous THF at -78 °C under inert atmosphere (argon) with constant stirring. Next, a solution of methyllithium 1.5 M (2.5 equiv) was added dropwise and then allowed to react for 30 min at -78 °C with constant stirring. A saturated solution of ammonium chloride (20 mL) was then added and kept with stirring until it reached room temperature. The product was extracted with diethyl ether (3 x 20 mL) and the extracts were combined and dried over anhydrous sodium sulfate. After evaporation of the solvent, the resulting oil was used for the next step.

(*S*)-1-chloro-3-(dibenzylamino)-2-butanone (**10a**). For full characterization see (Barluenga et al., 1995), yield 86%; pale yellow oil;  $^1\text{H}$  NMR ( $\text{CDCl}_3$ , 200 MHz):  $\delta$  7.35-7.23 (m, 10H), 4.56 (d, 1H,  $J = 15.9$  Hz), 4.20 (d, 1H,  $J = 15.9$  Hz), 3.70 (d, 2H,  $J = 13.6$  Hz), 3.58-3.48 (m, 1H), 3.42 (d, 2H,  $J = 13.6$  Hz), 1.22 (d, 3H,  $J = 6.6$  Hz);  $^{13}\text{C}$  NMR ( $\text{CDCl}_3$ , 50 MHz):  $\delta$  203.0, 138.4, 128.7, 128.6, 127.5, 61.0, 54.6, 47.8, 6.5.

1-chloro-3-(dibenzylamino)-2-propanone (**10b**). Yield 80%; pale yellow oil;  $^1\text{H}$  NMR ( $\text{CDCl}_3$ , 200 MHz):  $\delta$  7.35-7.26 (m, 10H), 4.14 (s, 2H), 3.66 (s, 4H), 3.34 (s, 2H);  $^{13}\text{C}$  NMR ( $\text{CDCl}_3$ , 50 MHz):  $\delta$  201.8, 138.0, 129.8, 128.5, 127.5, 60.1, 59.1, 47.7.

(*S*)-1-chloro-3-(dibenzylamino)-4-phenyl-2-butanone (**10c**). For full characterization see ref.(Barluenga et al., 1995), yield 90%; pale yellow oil;  $^1\text{H}$  NMR( $\text{CDCl}_3$ , 200 MHz):  $\delta$  7.46-7.11 (m, 15H) , 4.43 (d, 2H,  $J = 15.9$  Hz), 3.82 (d, 2H,  $J = 12.7$  Hz), 3.66 (dd, 1H,  $J = 3.7, 9.3$  Hz), 3.55 (d, 2H,  $J = 13.5$  Hz), 3.27-3.16 (dd, 1H,  $J = 9.4, 13.3$  Hz), 3.01-2.93 (dd, 1H,  $J = 3.7, 13.2$  Hz);  $^{13}\text{C}$ -NMR ( $\text{CDCl}_3$ , 50 MHz):  $\delta$  200.5, 138.6, 138.4, 129.4, 128.8, 128.6, 128.4, 127.5, 126.2, 66.6, 54.5, 47.8, 28.8.

(*S*)-4-(*tert*-butyldimethylsilyloxy)-1-chloro-3-(dibenzylamino)-2-butanone (**10d**). For full characterization see (Barluenga et al., 1999), yield 65%; pale yellow oil; <sup>1</sup>H NMR (CDCl<sub>3</sub>, 200 MHz): δ 7.34-7.21 (m, 10H), 4.74 (s, 2H), 4.35 (d, 2H, *J* = 14.3 Hz), 4.09 (d, 2H, *J* = 13.9 Hz), 3.70-3.60 (dd, 1H, *J* = 6.6 Hz), 0.85 (s, 9H), -0.02 (s, 6H); <sup>13</sup>C-NMR (CDCl<sub>3</sub>, 50 MHz): δ 201.7, 139.0, 128.9, 128.5, 127.3, 65.4, 64.9, 55.3, 48.3, 25.9, 18.1, -5.6, -5.3.

(*S*)-1-bromo-3-(dibenzylamino)-2-butanone (**10e**). For full characterization see ref. (Barluenga et al., 1999), yield 90%; pale yellow oil; <sup>1</sup>H NMR (DMSO, 200 MHz): δ 7.46-7.18 (m, 10H), 4.27 (d, 1H, *J* = 13.2 Hz), 4.19 (d, 1H, *J* = 13.2 Hz), 3.66-3.78 (m, 3H), 3.48 (d, 2H, *J* = 6.7 Hz), 1.27 (d, 3H, *J* = 6.7 Hz); <sup>13</sup>C NMR (DMSO, 50 MHz): δ 202.2, 138.8, 128.4, 128.0, 126.3, 60.9, 53.8, 35.1, 7.6

1-bromo-3-(dibenzylamino)-2-propanone (**10f**). Yield 80%; pale brown oil; <sup>1</sup>H NMR (CDCl<sub>3</sub>, 200 MHz): δ 7.41-7.22 (m, 10H), 3.89 (s, 2H), 3.67 (s, 4H), 3.39 (s, 2H); <sup>13</sup>C NMR (CDCl<sub>3</sub>, 50 MHz): δ 201.6, 138.0, 129.0, 128.5, 127.5, 60.7, 59.0, 32.8.

## 2 General procedure for the synthesis of di-propargyl α-amino esters

In a round bottom flask was added α-amino ester hydrochloride (1 equiv), potassium iodide (0.5 equiv), sodium bicarbonate (2.5 equiv) and propargyl chloride (2.5 equiv) in 50 mL of THF/DMSO (4:1 v/v) and refluxed for 8 h with constant stirring. The reaction mixture was transferred to a separating funnel, added water (250 mL) and extracted with DCM (3 x 60 mL). The extracts were combined and dried over anhydrous sodium sulfate. After evaporation of the solvent, the resulting oil was purified by flash chromatography.

(*S*)-methyl 2-(di(prop-2-yn-1-yl)amino)propanoate (**11a**). Yield 85%; yellow oil; *R<sub>f</sub>* 0.40 (ethyl acetate/petroleum ether 2:8 v/v); <sup>1</sup>H NMR (CDCl<sub>3</sub>, 200 MHz): δ 3.72 (s, 3H), 3.67-3.62 (m, 1H), 3.60 (d, 4H, *J* = 2.5 Hz), 2.26 (t, 2H, *J* = 2.3 Hz), 1.38 (d, 3H, *J* = 6.9 Hz). <sup>13</sup>C NMR (CDCl<sub>3</sub>, 50 MHz): δ 173.5, 78.9, 73.1, 58.9, 51.7, 39.7, 15.8; IR (film): 3290, 2120, 2106, 1732, 1436 cm<sup>-1</sup>; ESI-MS *m/z*: 218 [M+K]<sup>+</sup>

Ethyl 2-[di(prop-2-yn-1-yl)amino]acetate (**11b**). Yield 67%, yellow oil,  $R_f$  0.36 (ethyl acetate/petroleum ether 2:8 v/v);  $^1\text{H}$  NMR ( $\text{CDCl}_3$ , 200 MHz):  $\delta$  4.25-4.15 (q, 2H,  $J = 6.9$  Hz), 3.57 (d, 4H,  $J = 2.2$  Hz), 3.45 (s, 2H), 2.29-2.27 (t, 2H,  $J = 2.3$  Hz), 1.32-1.25 (t, 3H,  $J = 7.1$  Hz);  $^{13}\text{C}$  NMR ( $\text{CDCl}_3$ , 50 MHz):  $\delta$  170.2, 78.2, 73.7, 60.8, 53.5, 42.6, 14.2; FT-IR (film): 3290, 2120, 2106, 1744, 1444  $\text{cm}^{-1}$ ; ESI-MS  $m/z$ : 218  $[\text{M}+\text{K}]^+$

Methyl (*S*)-2-[di(prop-2-yn-1-yl)amino]-3-(1*H*-indol-3-yl)propanoate (**11c**). Yield 87%; brown solid; m.p. 55-57 °C;  $R_f$  0.38 (ethyl acetate/petroleum ether 1:1 v/v);  $^1\text{H}$  NMR ( $\text{CDCl}_3$ , 200 MHz):  $\delta$  8.12 (s, 1H), 7.67-7.58 (m, 1H), 7.36-6.98 (m, 4H), 3.91-3.81 (dd, 1H,  $J = 5.9$  Hz), 3.72 (d, 4H,  $J = 2.2$  Hz), 3.53 (s, 3H), 3.28-3.18 (m, 2H), 2.27 (t, 2H,  $J = 2.2$  Hz);  $^{13}\text{C}$  NMR ( $\text{CDCl}_3$ , 50 MHz):  $\delta$  172.4, 136.1, 127.4, 122.8, 121.9, 119.4, 118.6, 111.2, 111.1, 79.3, 73.0, 64.6, 51.3, 39.9, 25.9; FT-IR (film): 3412, 3290, 2120, 2106, 1729, 1620, 1595, 1340, 1213, 1170  $\text{cm}^{-1}$ ; ESI-MS  $m/z$ : 318  $[\text{M}+\text{Na}]^+$ , 333  $[\text{M}+\text{K}]^+$

Methyl (*S*)-2-[di(prop-2-yn-1-yl)amino]-3-phenylpropanoate (**11d**). Yield 74%; pale yellow oil;  $R_f$  0.80 (ethyl acetate/petroleum ether 1:1 v/v);  $^1\text{H}$  NMR ( $\text{CDCl}_3$ , 200 MHz):  $\delta$  7.44-7.07 (m, 5 H), 3.78-3.70 (t, 1H,  $J = 7.7$  Hz), 3.67 (d, 4H,  $J = 2.2$  Hz), 3.57 (s, 3 H), 3.04 (d, 2H,  $J = 7.7$  Hz), 2.26-2.24 (t, 2H,  $J = 2.3$  Hz);  $^{13}\text{C}$  NMR ( $\text{CDCl}_3$ , 50 MHz):  $\delta$  171.9, 137.3, 129.2, 129.4, 126.6, 79.1, 73.0, 65.7, 51.3, 39.9, 36.29; FT-IR (film): 3290, 2120, 2108, 1730, 1604, 1168  $\text{cm}^{-1}$ ; ESI-MS  $m/z$ : 256  $[\text{M}+\text{H}]^+$ , 278  $[\text{M}+\text{Na}]^+$

Methyl (*S*)-2-[di(prop-2-yn-1-yl)amino]-3-hydroxypropanoate (**11e**). Yield 59%; pale yellow oil;  $R_f$  0.85 (ethyl acetate/petroleum ether 1:1 v/v);  $^1\text{H}$  NMR ( $\text{CDCl}_3$ , 200 MHz):  $\delta$  4.24-4.13 (q, 2H,  $J = 7.1$  Hz), 3.88-3.74 (m, 2H), 3.68-3.66 (t, 4H,  $J = 2.2$  Hz), 2.68-2.64 (m, 1H), 2.30-2.28 (t, 2H,  $J = 2.3$  Hz), 1.34-1.27 (t, 3H,  $J = 7.1$  Hz);  $^{13}\text{C}$  NMR ( $\text{CDCl}_3$ , 50 MHz):  $\delta$  170.6, 79.3, 73.2, 64.1, 60.9, 59.8, 40.1, 14.2. IR (film): 3416, 3290, 2120, 2108, 1730, 1188  $\text{cm}^{-1}$ ; ESI-MS  $m/z$ : 210  $[\text{M}+\text{H}]^+$ , 232  $[\text{M}+\text{Na}]^+$ , 441  $[2\text{M}+\text{Na}]^+$

Figure S1 - (*S*)-methyl 2-(di(prop-2-yn-1-yl)amino)propanoate (11a).

<sup>1</sup>H-NMR

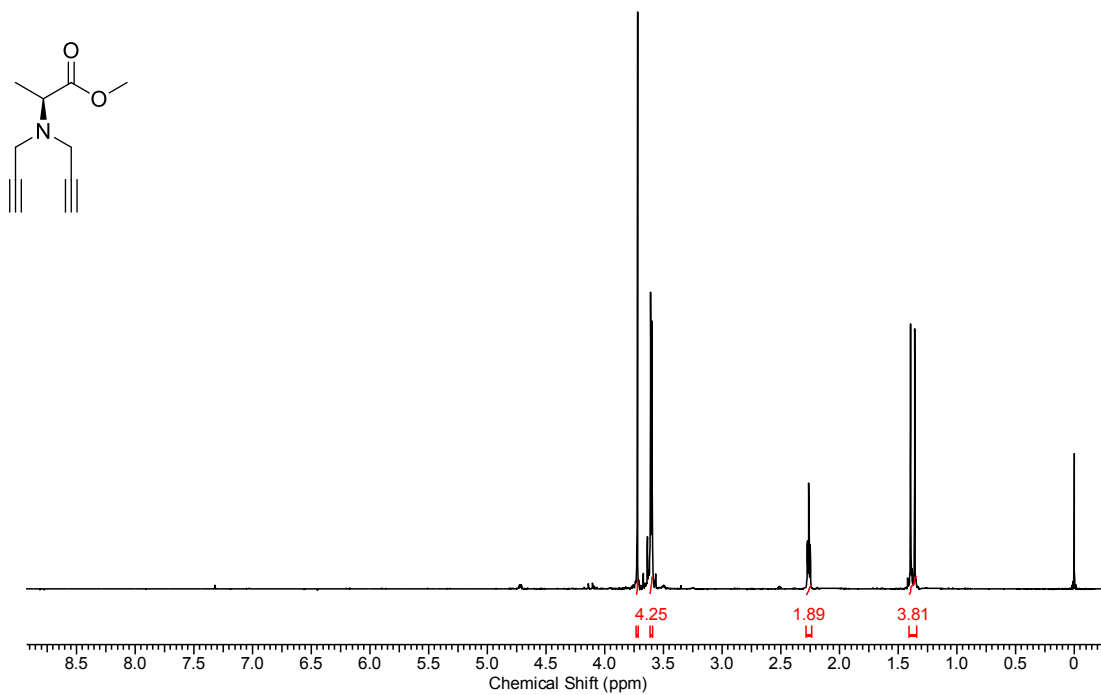

<sup>13</sup>C-NMR

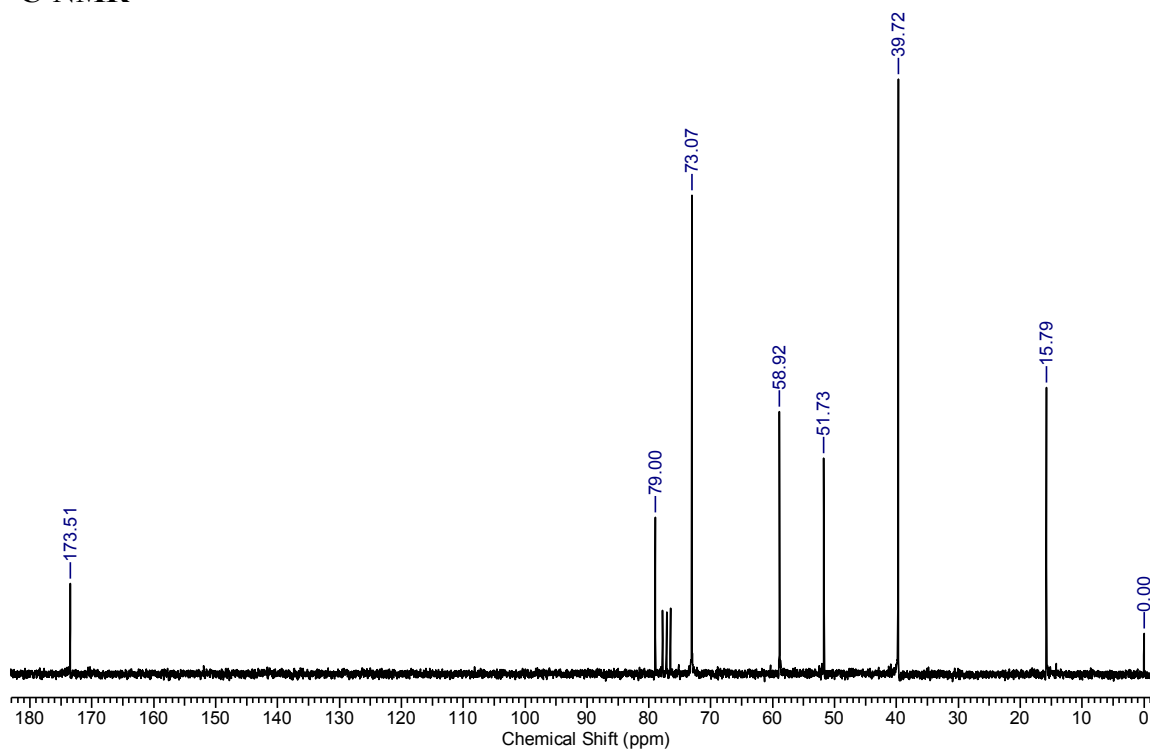

Figure S2 - Ethyl 2-(di(prop-2-yn-1-yl)amino)acetate (11b).

<sup>1</sup>H-NMR

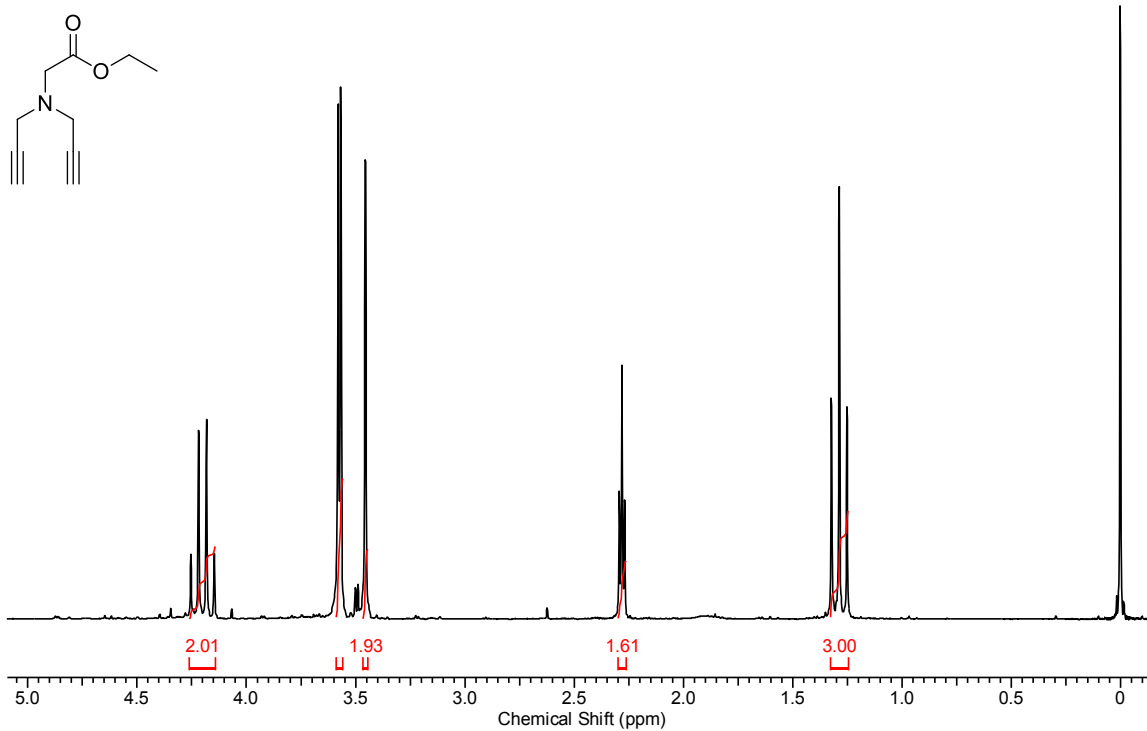

<sup>13</sup>C-NMR

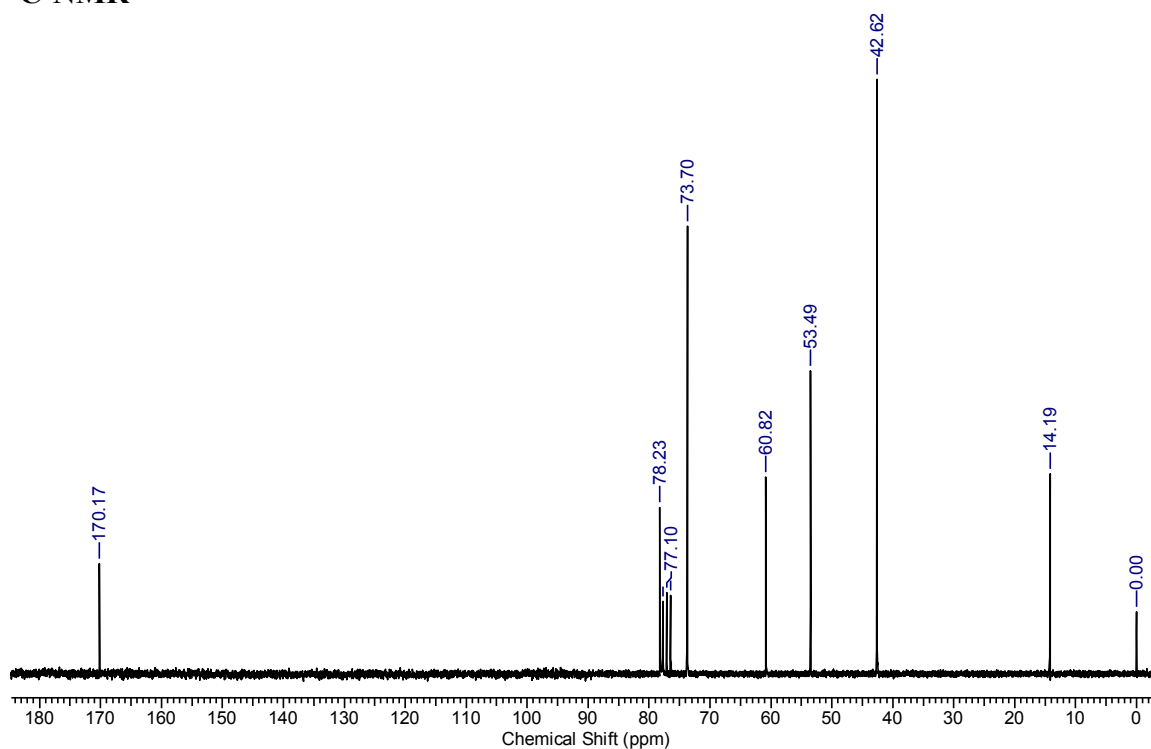

Figure S3 - (S)-methyl 2-(di(prop-2-yn-1-yl)amino)-3-(1H-indol-3-yl)propanoate (11c).

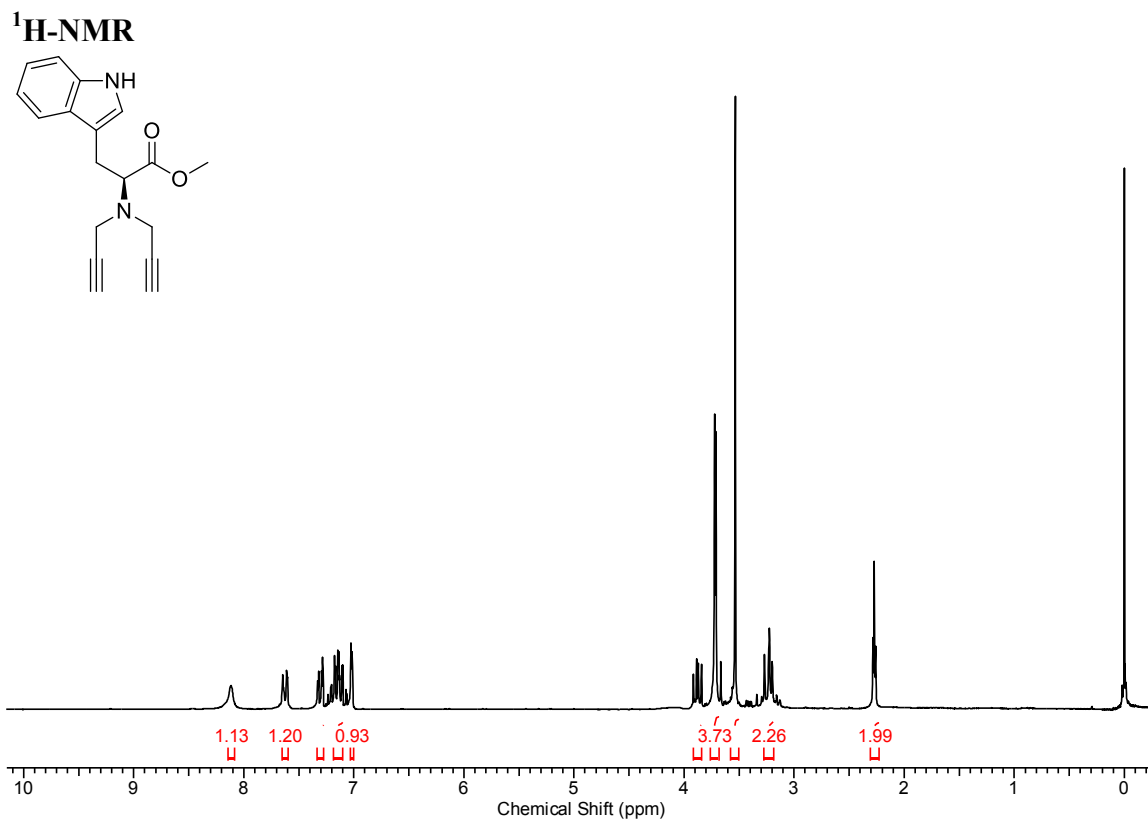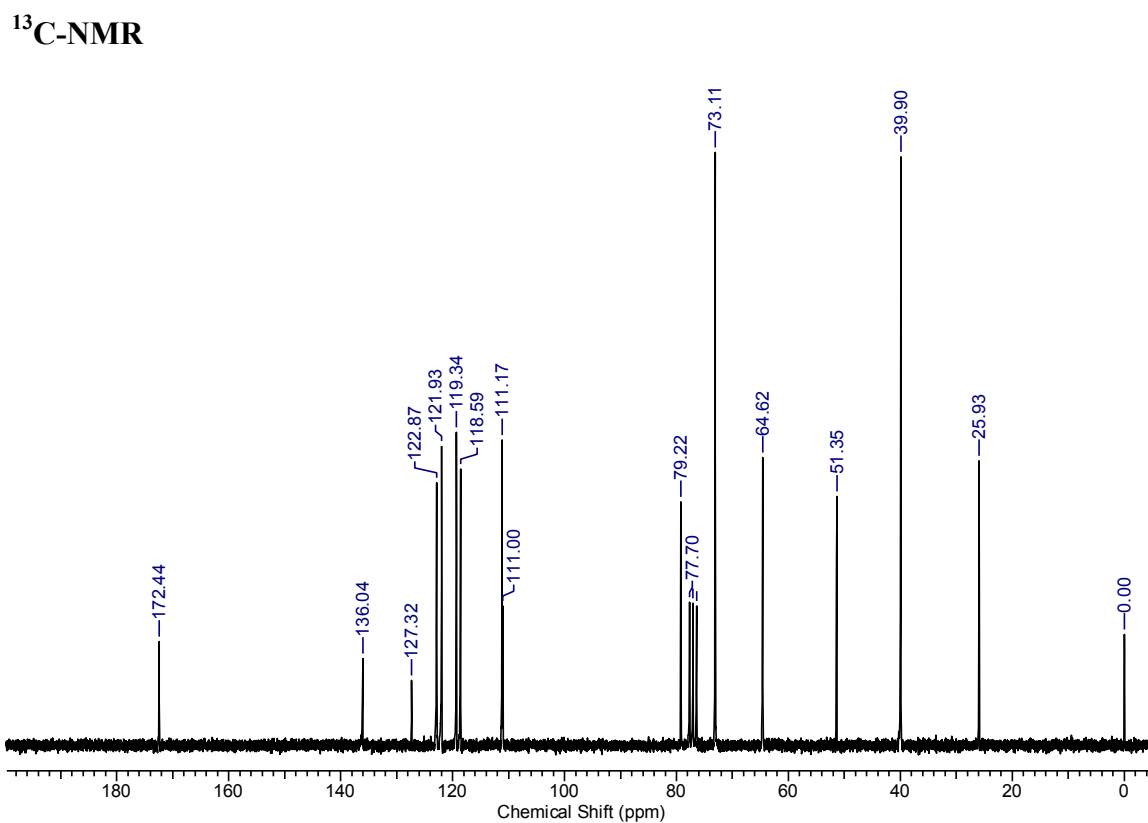



Figure S4 - (*S*)-methyl 2-(di(prop-2-yn-1-yl)amino)-3-phenylpropanoate (11d).

<sup>1</sup>H-NMR

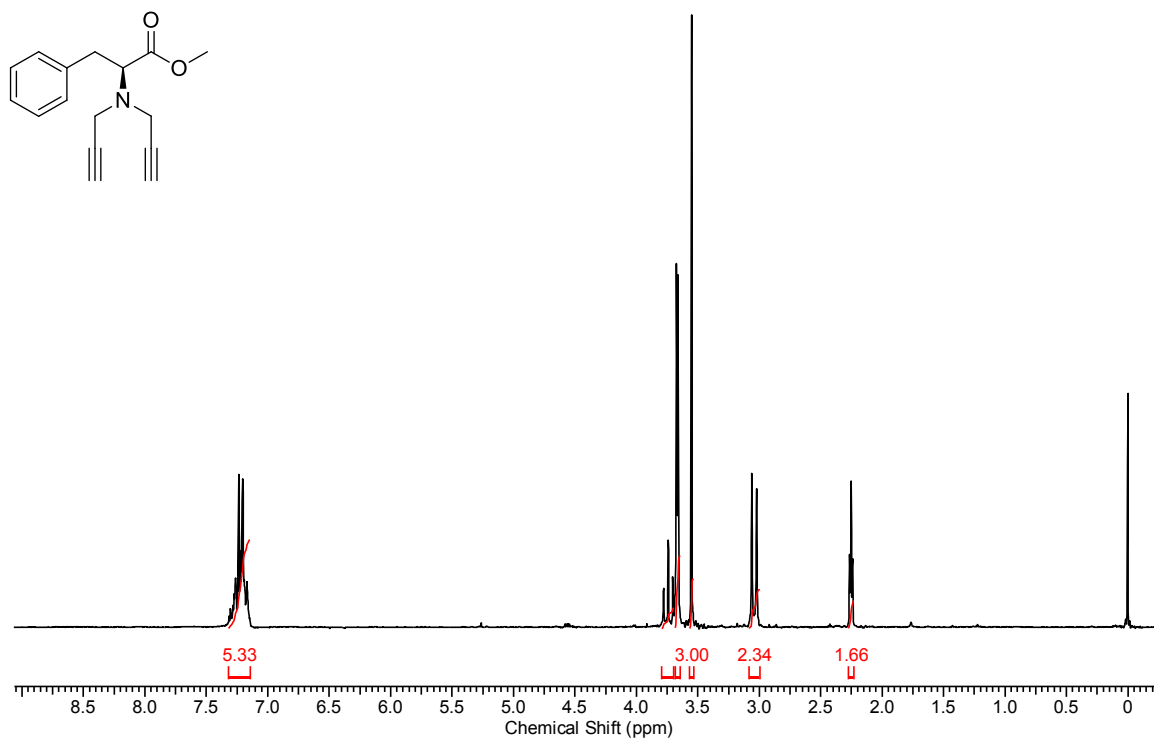

<sup>13</sup>C-NMR

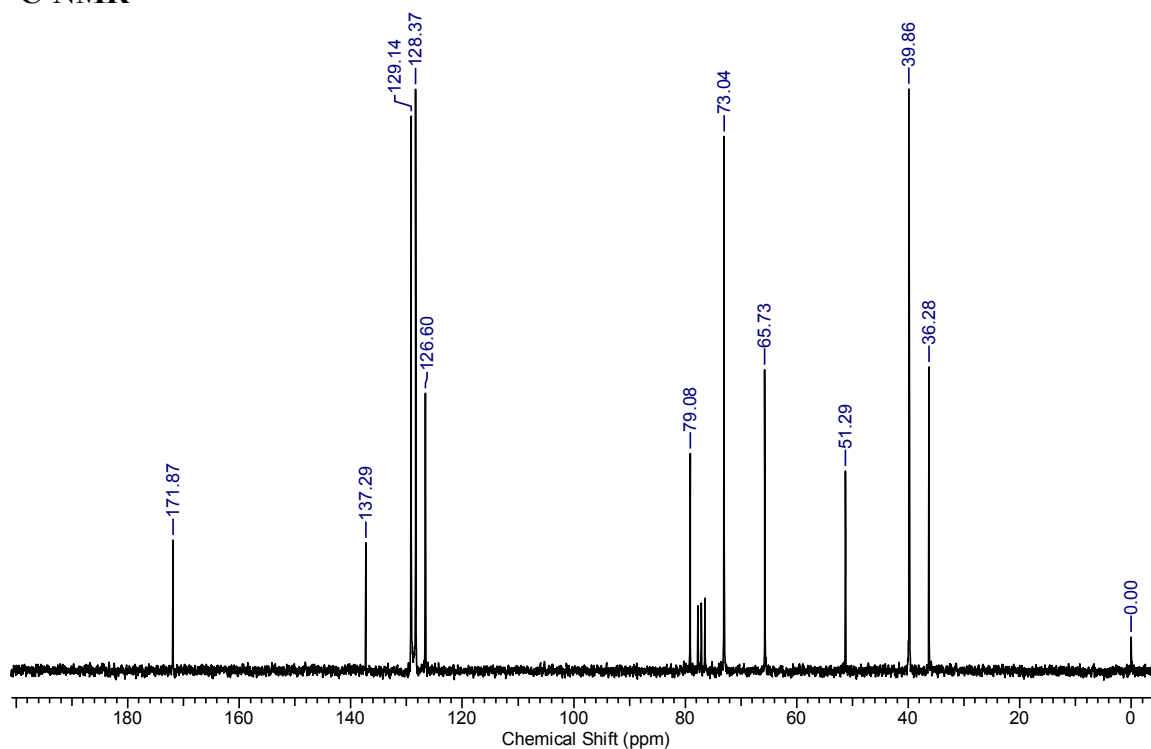

Figure S5 - (*S*)-methyl 2-(di(prop-2-yn-1-yl)amino)-3-hydroxypropanoate (11e).

<sup>1</sup>H-NMR

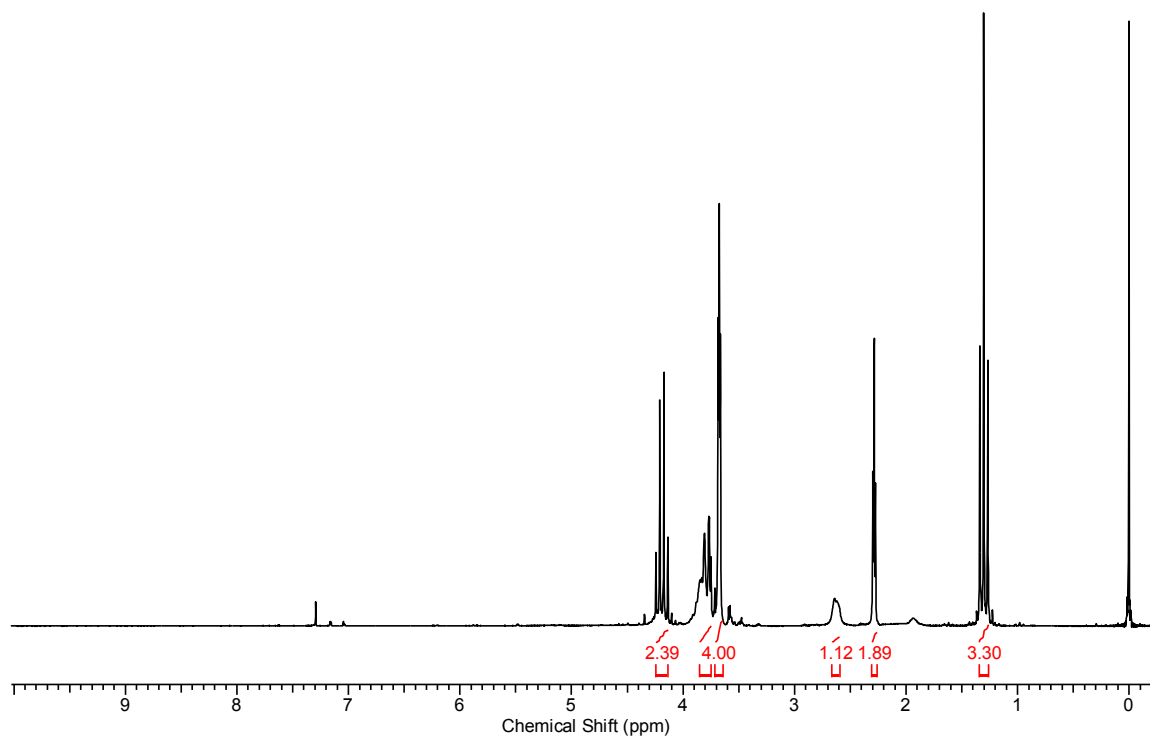

<sup>13</sup>C-NMR

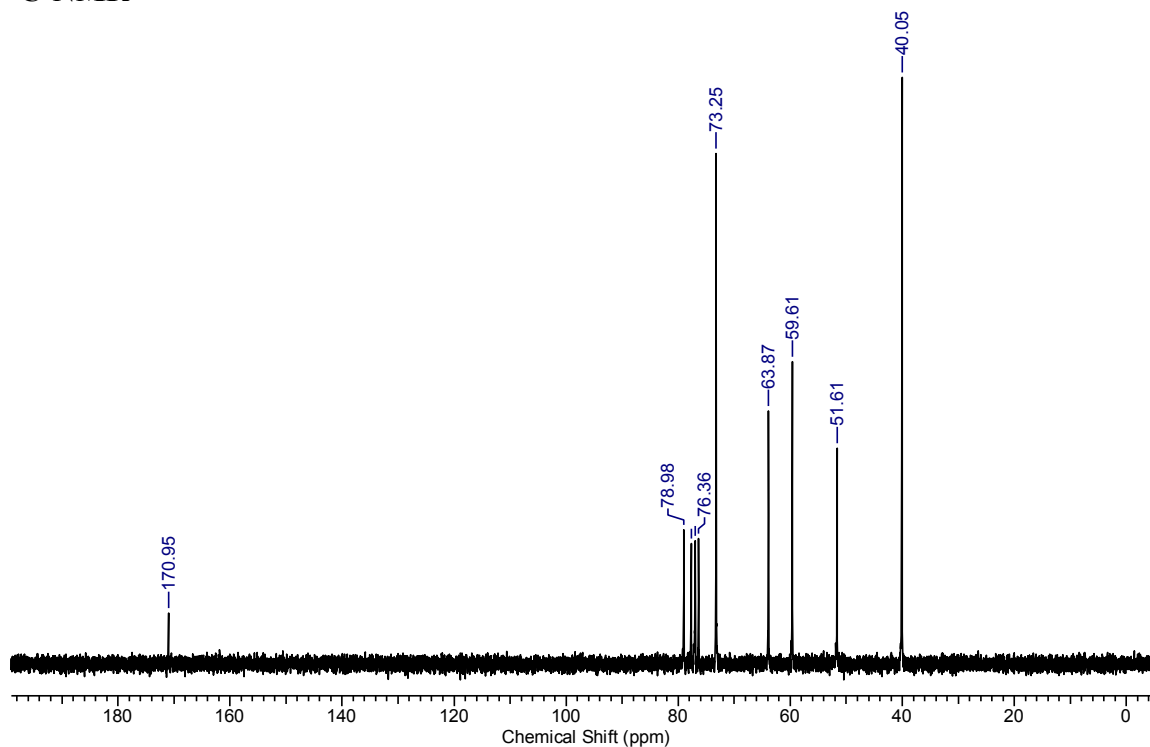

**Figure S6** - (S)-methyl 2-(((1-((R)-3-(dibenzylamino)-2-oxobutyl)-1H-1,2,3-triazol-4-yl)methyl)((1-((S)-3-(dibenzylamino)-2-oxobutyl)-1H-1,2,3-triazol-4-yl)methyl)amino)propanoate (6a).

### <sup>1</sup>H-NMR

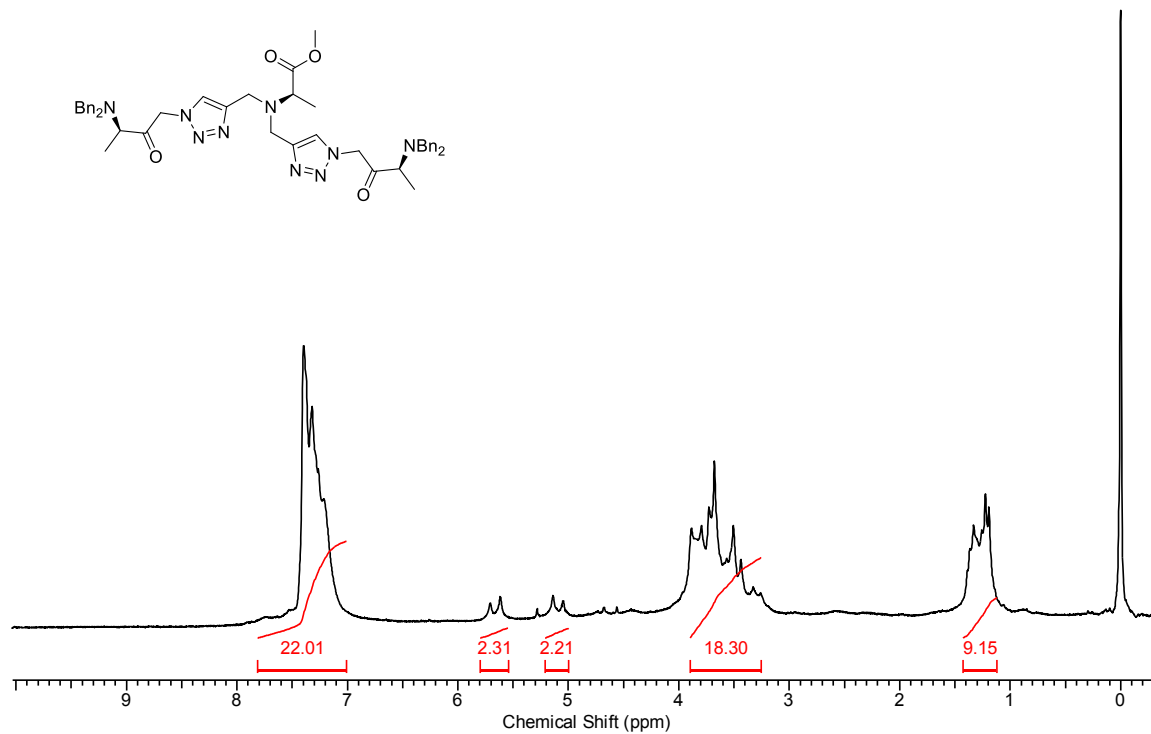

### <sup>13</sup>C-NMR

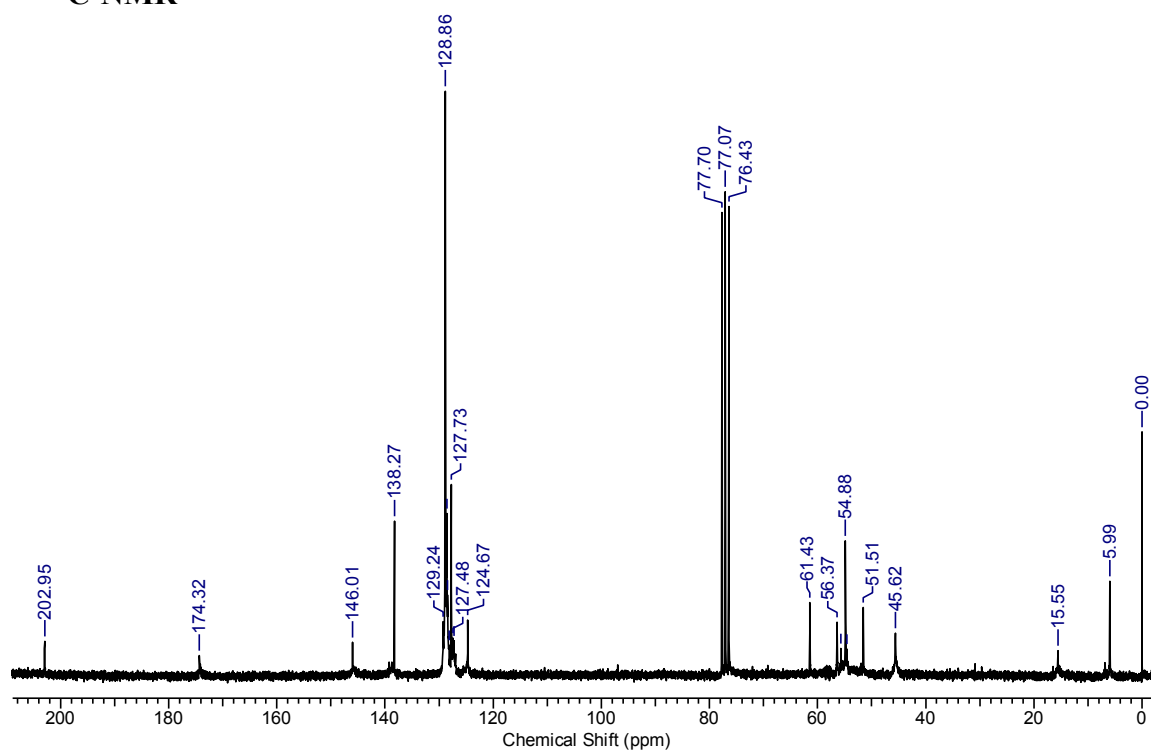

# HRMS-ESI

## Mass Spectrum SmartFormula Report

**Analysis Info**  
 Analysis Name: D:\Data\Entrenamiento\Data\Juansarmiento\EXP171\_MSPositivo\_2.d  
 Method: tune\_low\_LC\_modificado.m  
 Sample Name:  
 Comment:  
 Acquisition Date: 5/10/2014 2:08:57 PM  
 Operator: CBS\_UAM\_I  
 Instrument: micrOTOF 213750.00410

**Acquisition Parameter**

|             |          |                      |          |                  |           |
|-------------|----------|----------------------|----------|------------------|-----------|
| Source Type | ESI      | Ion Polarity         | Positive | Set Nebulizer    | 5.0 Bar   |
| Focus       | Active   |                      |          | Set Dry Heater   | 190 °C    |
| Scan Begin  | 50 m/z   | Set Capillary        | 4500 V   | Set Dry Gas      | 2.0 l/min |
| Scan End    | 2000 m/z | Set End Plate Offset | -500 V   | Set Divert Valve | Source    |

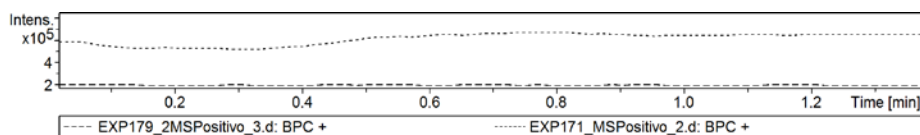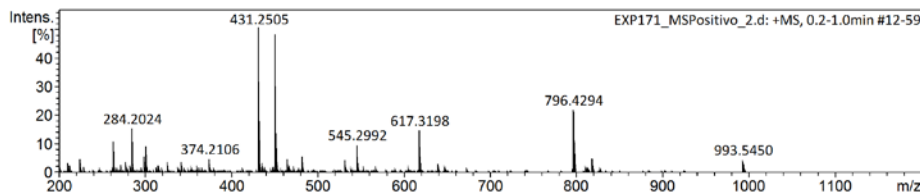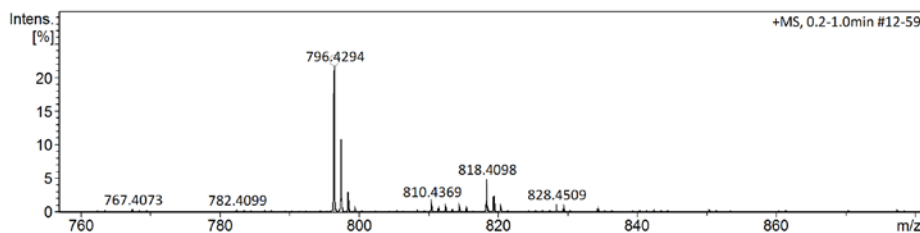

| Meas. m/z | # | Ion Formula                                                   | m/z      | err [ppm] | mSigma | # Sigma | Score  | rdb  | e <sup>-</sup> | Conf | N-Rule |
|-----------|---|---------------------------------------------------------------|----------|-----------|--------|---------|--------|------|----------------|------|--------|
| 796.4294  | 1 | C <sub>46</sub> H <sub>54</sub> N <sub>9</sub> O <sub>4</sub> | 796.4293 | 0.0       | 17.8   | 4       | 100.00 | 24.5 | even           |      | ok     |

**Figure S7** - (R)-methyl 2-(((1-((R)-3-(dibenzylamino)-2-oxobutyl)-1H-1,2,3-triazol-4-yl)methyl)((1-((S)-3-(dibenzylamino)-2-oxobutyl)-1H-1,2,3-triazol-4-yl)methyl)amino)-3-(1H-indol-3-yl)propanoate (6b).

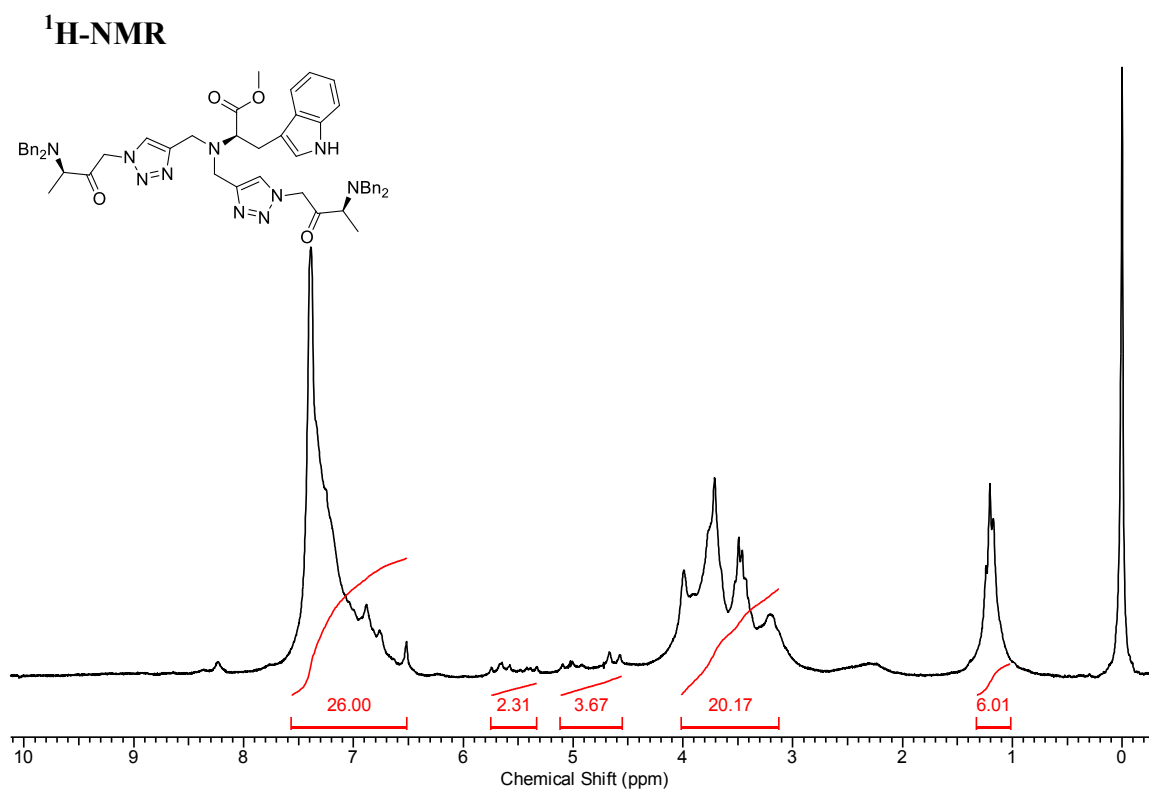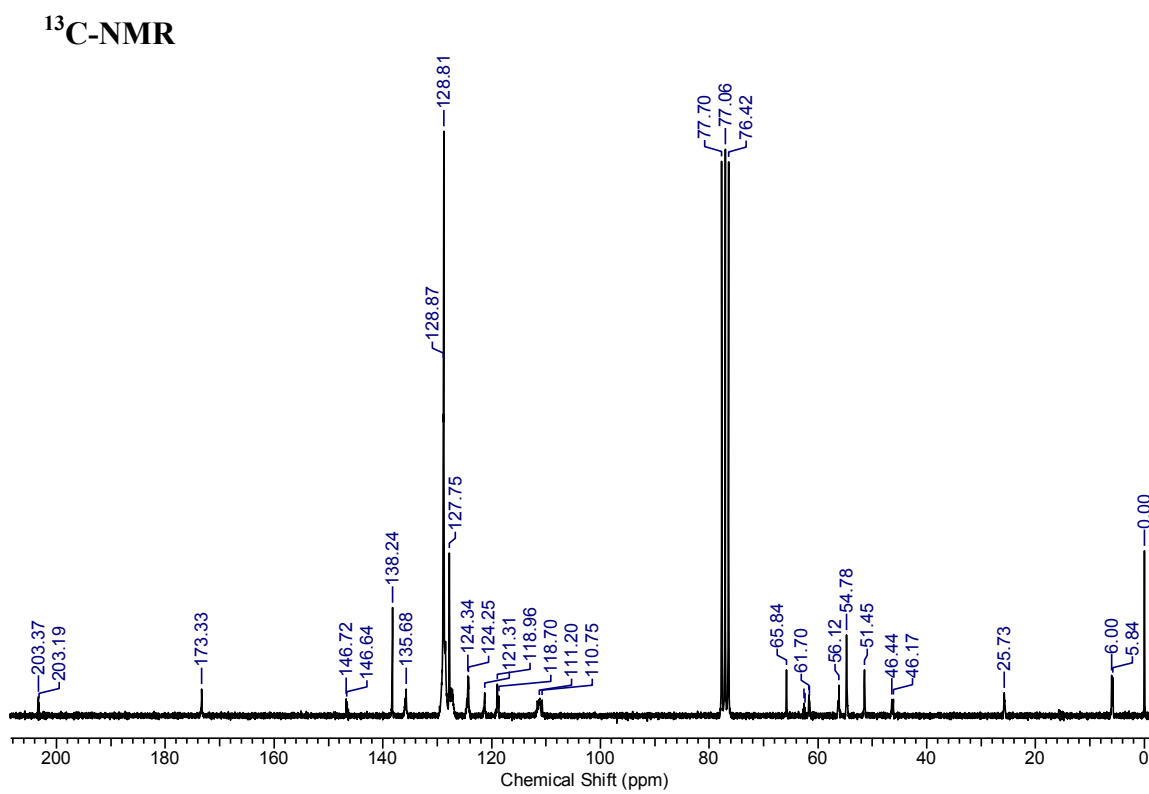

# HRMS-ESI

## Mass Spectrum SmartFormula Report

**Analysis Info**  
 Analysis Name D:\Data\Entrenamiento\Data\Juansarmiento\EXP179\_2MSPositivo\_3.d  
 Method tune\_low\_LC\_modificado.m  
 Sample Name  
 Comment  
 Acquisition Date 5/10/2014 1:53:42 PM  
 Operator CBS\_UAM\_I  
 Instrument micrOTOF 213750.00410

**Acquisition Parameter**  
 Source Type ESI Ion Polarity Positive Set Nebulizer 0.3 Bar  
 Focus Active Set Dry Heater 190 °C  
 Scan Begin 50 m/z Set Capillary 4500 V Set Dry Gas 3.0 l/min  
 Scan End 2000 m/z Set End Plate Offset -500 V Set Divert Valve Source

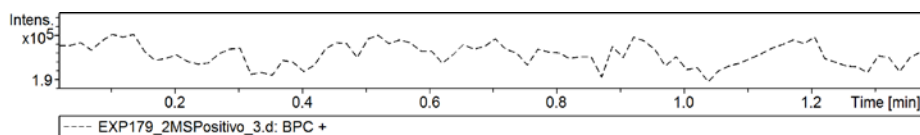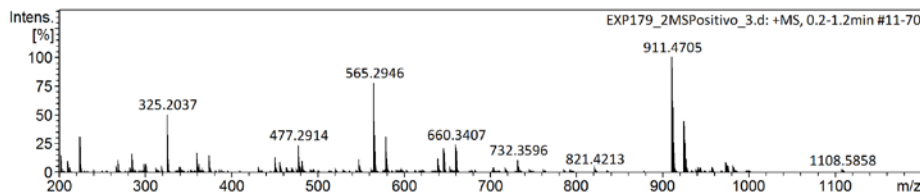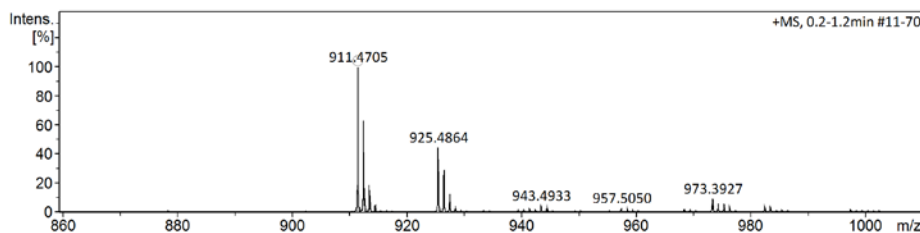

| Meas. m/z | # | Ion Formula | m/z      | err [ppm] | mSigma | # Sigma | Score | rdb  | e <sup>-</sup> Conf | N-Rule |
|-----------|---|-------------|----------|-----------|--------|---------|-------|------|---------------------|--------|
| 911.4705  | 1 | C54H59N10O4 | 911.4715 | 1.1       | 7.5    | 1       | 71.67 | 30.5 | even                | ok     |

**Figure S8** - ethyl 2-(((1-((R)-3-(dibenzylamino)-2-oxobutyl)-1H-1,2,3-triazol-4-yl)methyl)((1-((S)-3-(dibenzylamino)-2-oxobutyl)-1H-1,2,3-triazol-4-yl)methyl)amino)acetate (6c).

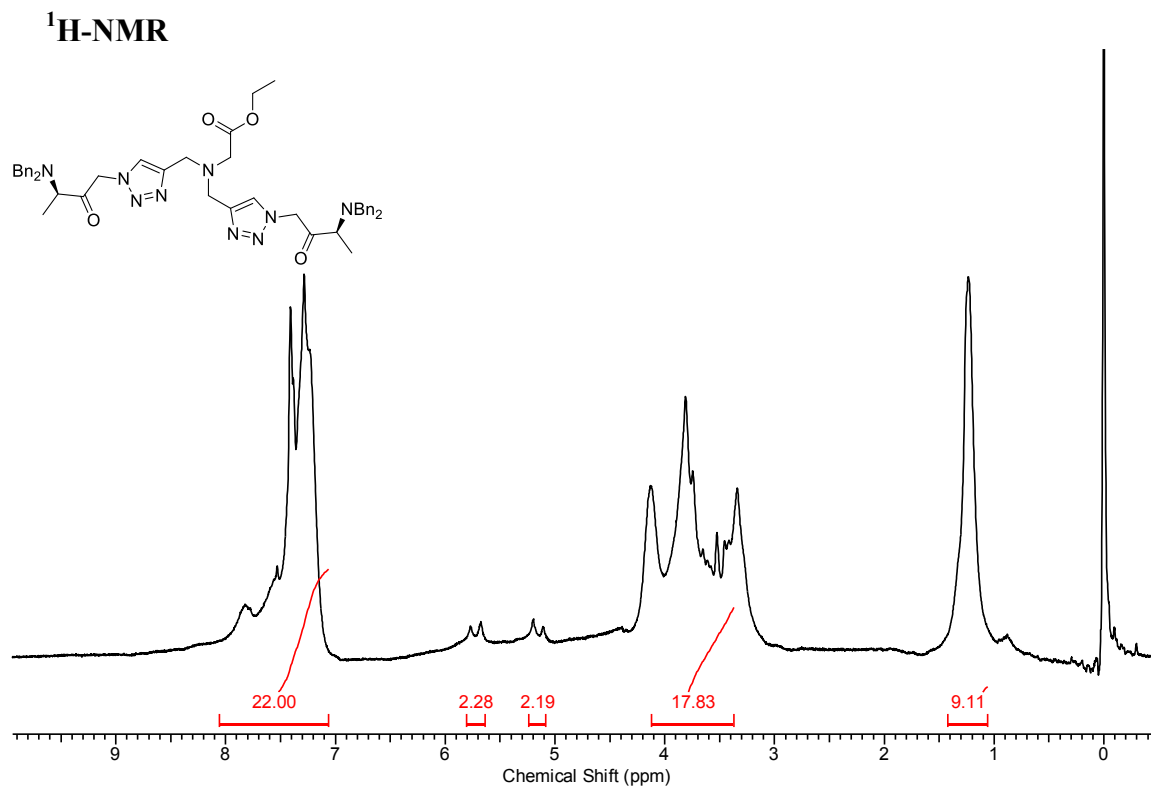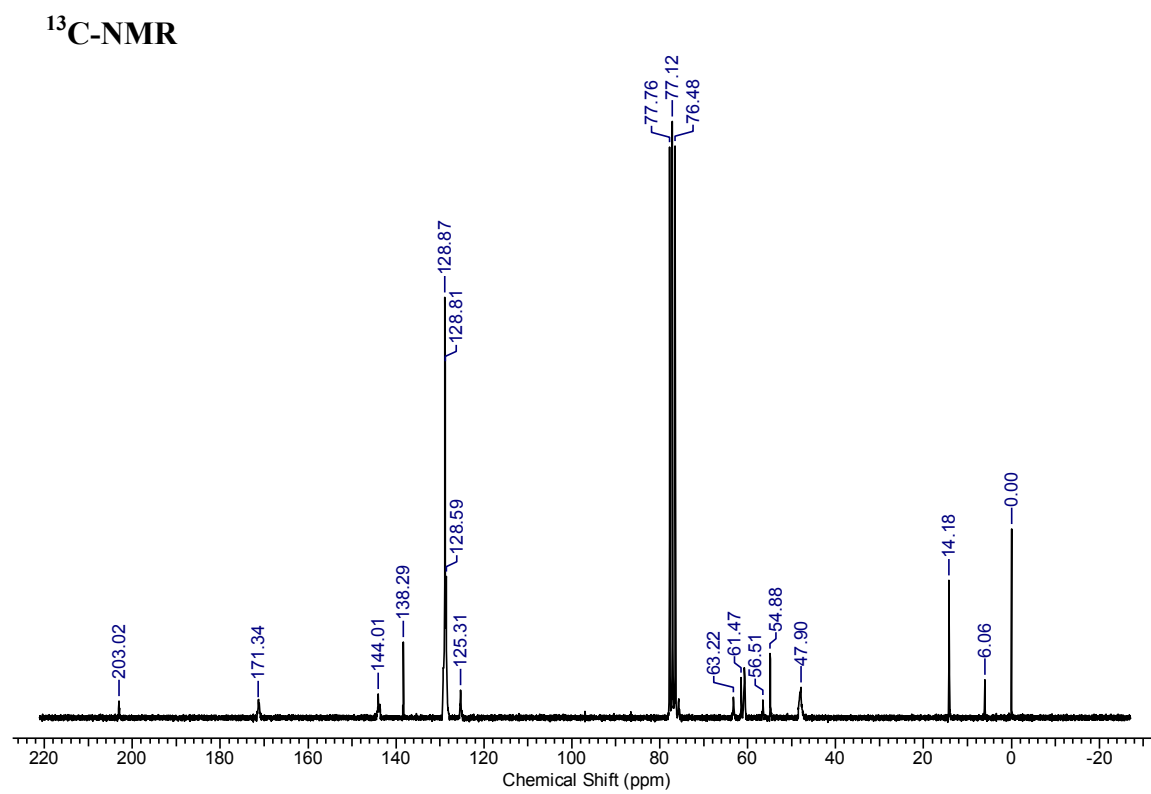

**Figure S9** - (R)-methyl 2-(((1-(R)-3-(dibenzylamino)-2-oxobutyl)-1H-1,2,3-triazol-4-yl)methyl)((1-(S)-3-(dibenzylamino)-2-oxobutyl)-1H-1,2,3-triazol-4-yl)methyl)amino)-3-hydroxy propanoate (**6d**).

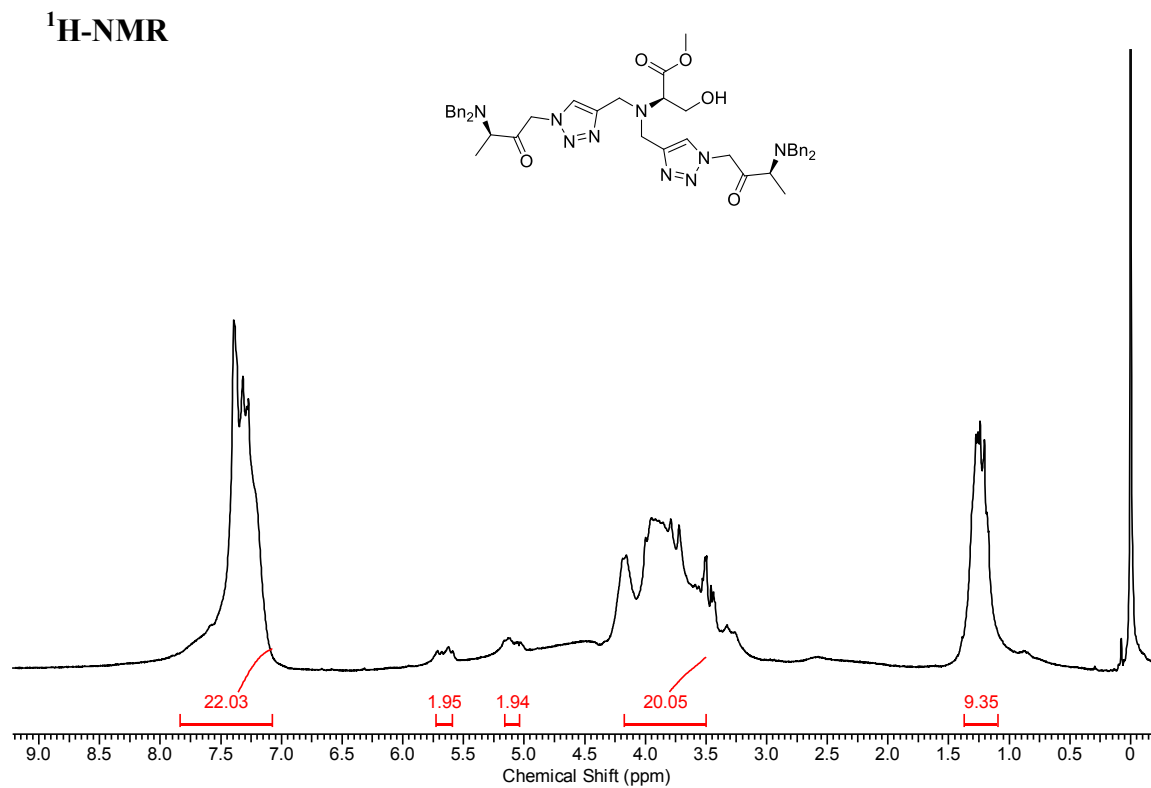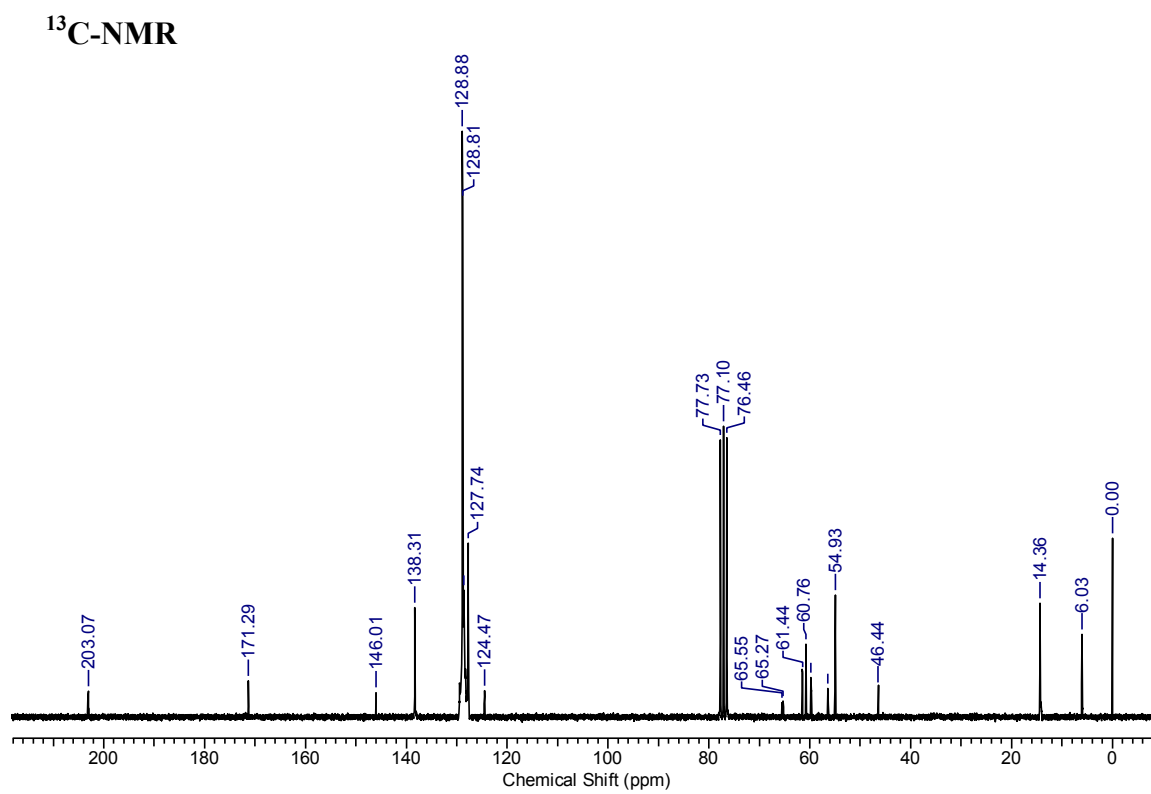



## REFERENCES

- Barluenga, J., Baragaña, B., Concellón, J.M., 1995. *The Journal of Organic Chemistry* 60 (21), 6696-6699.
- Barluenga, J., Baragaña, B., Concellón, J.M., 1999. *The Journal of Organic Chemistry* 64 (8), 2843-2846.
